# Supplementary material for: Broadband and massive Stokes shift luminescence in fully inorganic 2D-layered perovskite CsPb2Cl5: single crystal growth and self-trapped exciton emission
Source: Royal Society of Chemistry journal article supplement (doi:10.1039/d1tc01185e), 2021-01-01
Supplement: d1tc01185e1.pdf [file d1tc01185e1.pdf]

## Supporting Information

### **Broad Band and Massive Stokes Shift Luminescence in Fully Inorganic 2D Layered Perovskite CsPb<sub>2</sub>Cl<sub>5</sub>: Single Crystal Growth and Self-Trapped Exciton Emission**

Qing Yao <sup>1</sup>, Jie Zhang <sup>1</sup>, Kaiyu Wang <sup>1</sup>, Lin Jing <sup>1</sup>, Xiaohua Cheng <sup>1</sup>, Chenyu Shang <sup>1</sup>, Jianxu Ding<sup>\*,1</sup>, Weiwei Zhang <sup>1</sup>, Haiqing Sun<sup>\*,1</sup>, Tianliang Zhou<sup>\*,2</sup>

1. College of Materials Science and Engineering, Shandong University of Science and Technology, Qingdao 266590, China;
2. College of Materials, Xiamen University, Xiamen 361005, China;

## 1. Descriptions of the raw materials purity and crystal growth process

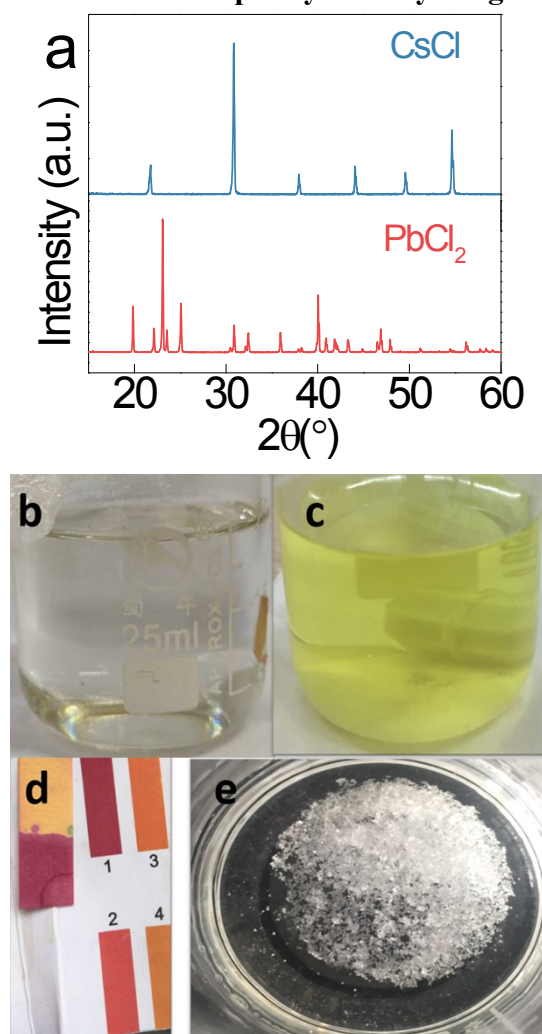

Figure S1. (a) XRD patterns of CsCl and PbCl<sub>2</sub>; (b) The solution dissolved CsCl and PbCl<sub>2</sub>; (c) Light yellow solution after growing for a period; (d) The pH value of the solution; (e) Large number of spontaneous small opaque crystals.

## 2. Pure $\text{CsPb}_2\text{Cl}_5$ and $\text{CsPb}_2(\text{Cl}_{0.95}\text{Br}_{0.05})_5$ single crystals

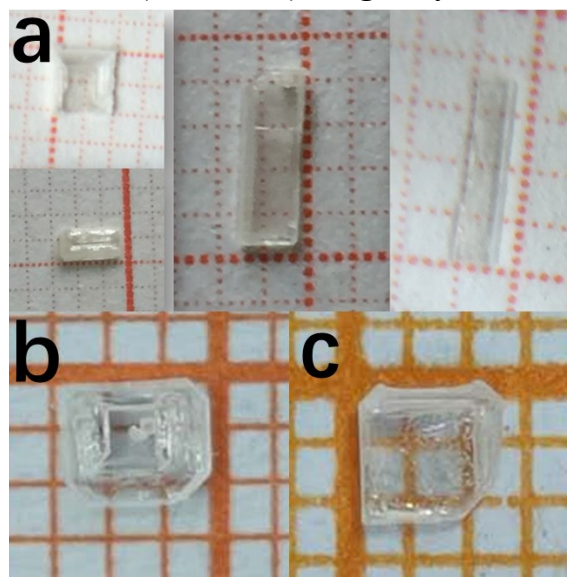

Figure S2. (a-b) Photos of pure  $\text{CsPb}_2\text{Cl}_5$  SCs grown with the molar ratio of CsCl to  $\text{PbCl}_2$  of 1:1 and 1:2 respectively; (c) Photo of  $\text{CsPb}_2(\text{Cl}_{0.95}\text{Br}_{0.05})_5$  SC.

3. (002) planes XRD patterns of  $\text{CsPb}_2\text{Cl}_5$  and  $\text{CsPb}_2(\text{Cl}_{0.95}\text{Br}_{0.05})_5$  SCs

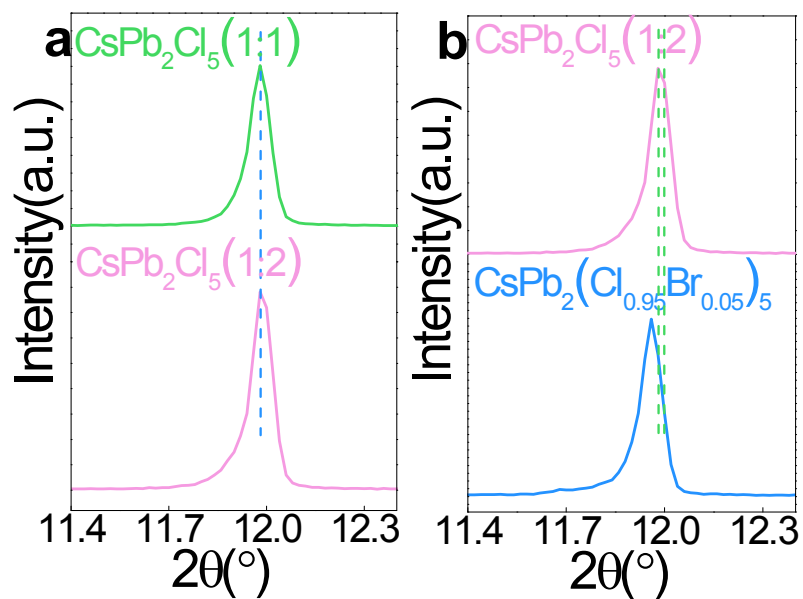

Figure S3. (a-b) Magnified XRD of pure  $\text{CsPb}_2\text{Cl}_5$  and  $\text{CsPb}_2(\text{Cl}_{0.95}\text{Br}_{0.05})_5$  for (002) plane.

#### 4. The bond lengths and bond angles of [Pb-Cl]<sub>8</sub> and [Cs-Cl]<sub>10</sub> polyhedrons

Table S1. List of Pb-Cl and Cs-Cl bond lengths in [Pb-Cl]<sub>8</sub> and [Cs-Cl]<sub>10</sub> polyhedrons.

| Atoms        | Pb                |                   |                   | Cs                |                   |
|--------------|-------------------|-------------------|-------------------|-------------------|-------------------|
| Neighbor Cl  | 2 Cl <sub>1</sub> | 2 Cl <sub>2</sub> | 4 Cl <sub>3</sub> | 2 Cl <sub>4</sub> | 8 Cl <sub>5</sub> |
| Distance (Å) | 2.753(8)          | 3.024(7)          | 3.210(3)          | 3.693(2)          | 3.589(6)          |

Table S2. List of bond angles between neighbor [Pb-Cl]<sub>8</sub> and [Cs-Cl]<sub>10</sub> polyhedrons.

| Atoms1-2-3                          | Angle1-2-3 (°) | Atoms1-2-3                          | Angle1-2-3 (°) |
|-------------------------------------|----------------|-------------------------------------|----------------|
| Cl <sub>1</sub> -Pb-Cl <sub>1</sub> | 84.306(57)     | Cl <sub>4</sub> -Cs-Cl <sub>4</sub> | 180.000        |
| Cl <sub>1</sub> -Pb-Cl <sub>2</sub> | 76.687(36)     | Cl <sub>4</sub> -Cs-Cl <sub>5</sub> | 59.068(44)     |
| Cl <sub>2</sub> -Pb-Cl <sub>2</sub> | 143.809(22)    | Cl <sub>4</sub> -Cs-Cl <sub>5</sub> | 120.932(47)    |
| Cl <sub>1</sub> -Pb-Cl <sub>3</sub> | 93.477(51)     | Cl <sub>5</sub> -Cs-Cl <sub>5</sub> | 74.679(41)     |
| Cl <sub>1</sub> -Pb-Cl <sub>3</sub> | 146.455(56)    | Cl <sub>5</sub> -Cs-Cl <sub>5</sub> | 118.136(37)    |
| Cl <sub>2</sub> -Pb-Cl <sub>3</sub> | 70.263(32)     | Cl <sub>5</sub> -Cs-Cl <sub>5</sub> | 73.558(58)     |
| Cl <sub>2</sub> -Pb-Cl <sub>3</sub> | 135.419(34)    | Cl <sub>5</sub> -Cs-Cl <sub>5</sub> | 76.845(39)     |
| Cl <sub>3</sub> -Pb-Cl <sub>3</sub> | 67.050(48)     | Cl <sub>5</sub> -Cs-Cl <sub>5</sub> | 139.116(42)    |
| Cl <sub>3</sub> -Pb-Cl <sub>3</sub> | 70.296(44)     | Cl <sub>5</sub> -Cs-Cl <sub>5</sub> | 144.241(42)    |
| Cl <sub>3</sub> -Pb-Cl <sub>3</sub> | 105.837(50)    | Cs-Cl <sub>4</sub> -Cs              | 57.288(13)     |
| Pb-Cl <sub>1</sub> -Pb              | 91.324(45)     | Cs-Cl <sub>5</sub> -Cs              | 106.442(41)    |
| Pb-Cl <sub>2</sub> -Pb              | 90.000         | -----                               | -----          |
| Pb-Cl <sub>3</sub> -Pb              | 74.163(36)     | -----                               | -----          |

5. Full XPS profiles of  $\text{CsPb}_2\text{Cl}_5$  and  $\text{CsPb}_2(\text{Cl}_{0.95}\text{Br}_{0.05})_5$  SCs

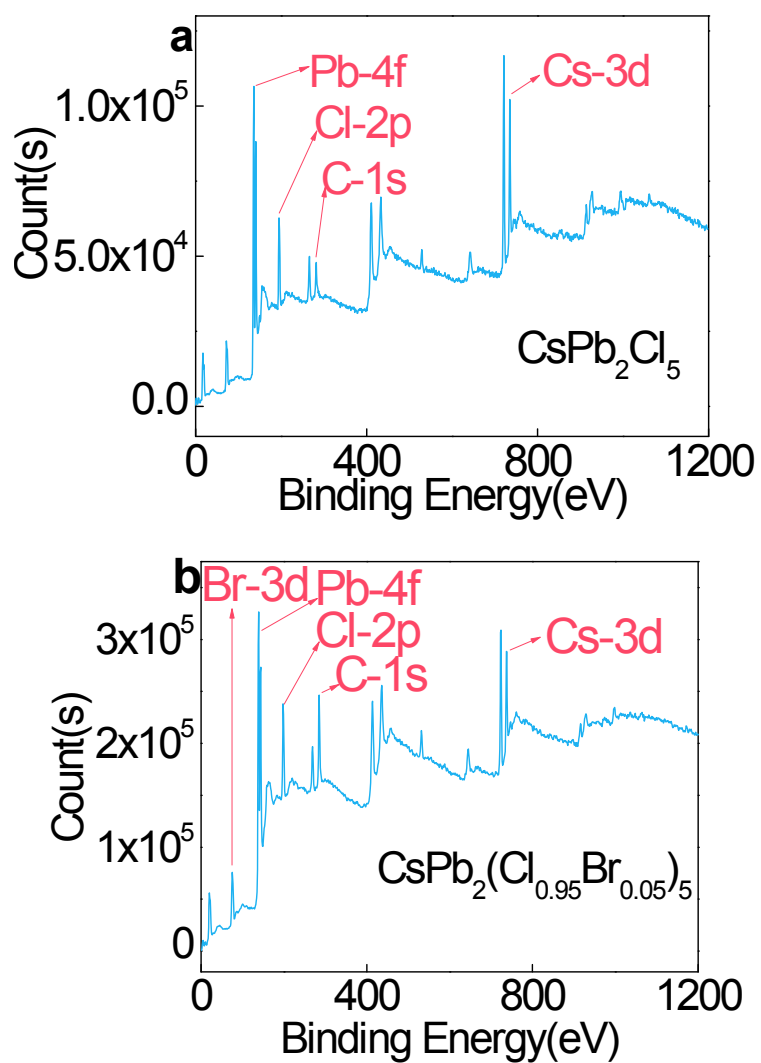

Figure S4. (a-b) Full XPS profiles of  $\text{CsPb}_2\text{Cl}_5$  and  $\text{CsPb}_2(\text{Cl}_{0.95}\text{Br}_{0.05})_5$  SCs.

## 6. XPS binding energy of CsPb<sub>2</sub>Cl<sub>5</sub> and CsPb<sub>2</sub>(Cl<sub>0.95</sub>Br<sub>0.05</sub>)<sub>5</sub> SCs

Table S3. Comparison of XPS binding energy of CsPb<sub>2</sub>Cl<sub>5</sub> and CsPb<sub>2</sub>(Cl<sub>0.95</sub>Br<sub>0.05</sub>)<sub>5</sub> SCs.

| Samples<br>Elements | Binding Energy(eV)                |                                                                         |
|---------------------|-----------------------------------|-------------------------------------------------------------------------|
|                     | CsPb <sub>2</sub> Cl <sub>5</sub> | CsPb <sub>2</sub> (Cl <sub>0.95</sub> Br <sub>0.05</sub> ) <sub>5</sub> |
| Cs-3d               | 723.8                             | 723.5                                                                   |
|                     | 737.8                             | 737.5                                                                   |
| Pb-4f               | 138.6                             | 138.7                                                                   |
|                     | 143.5                             | 143.5                                                                   |
| Cl-2p               | 197.9                             | 197.9                                                                   |
|                     | 199.5                             | 199.4                                                                   |
| Br-3d               | ----                              | 67.9                                                                    |
|                     | ----                              | 67.0                                                                    |

7. The PL spectra of different references,  $\text{CsPb}_2\text{Cl}_5$  and  $\text{CsPb}_2(\text{Cl}_{0.95}\text{Br}_{0.05})_5$  powders

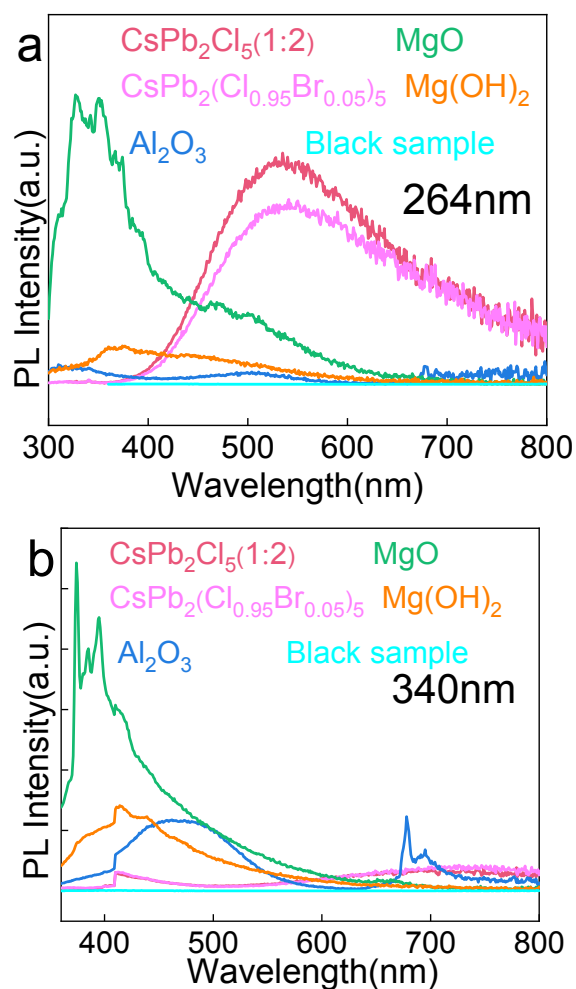

Figure S5. (a-b) The PL spectra of different reference substances,  $\text{CsPb}_2\text{Cl}_5$  and  $\text{CsPb}_2(\text{Cl}_{0.95}\text{Br}_{0.05})_5$  crystal.



## 8. Photoluminescence spectra of $\text{CsPb}_2\text{Cl}_5$ and $\text{CsPb}_2(\text{Cl}_{0.95}\text{Br}_{0.05})_5$ SCs obtained

at various excitation energy densities

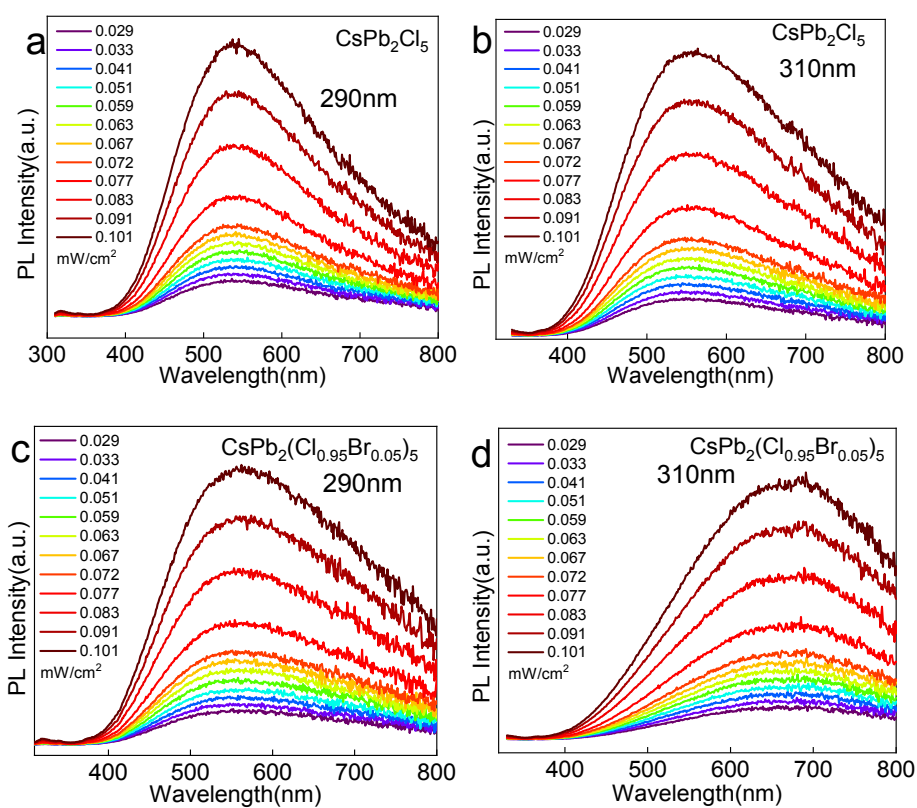

Figure S6. (a-d) Photoluminescence spectra of  $\text{CsPb}_2\text{Cl}_5$  and  $\text{CsPb}_2(\text{Cl}_{0.95}\text{Br}_{0.05})_5$  SCs obtained at various excitation energy densities under the excitation of 290 and 310 nm.

9. The XRD of initial  $\text{CsPb}_2\text{Cl}_5$  and after soaking for 2 hours using a 306 nm illumination.

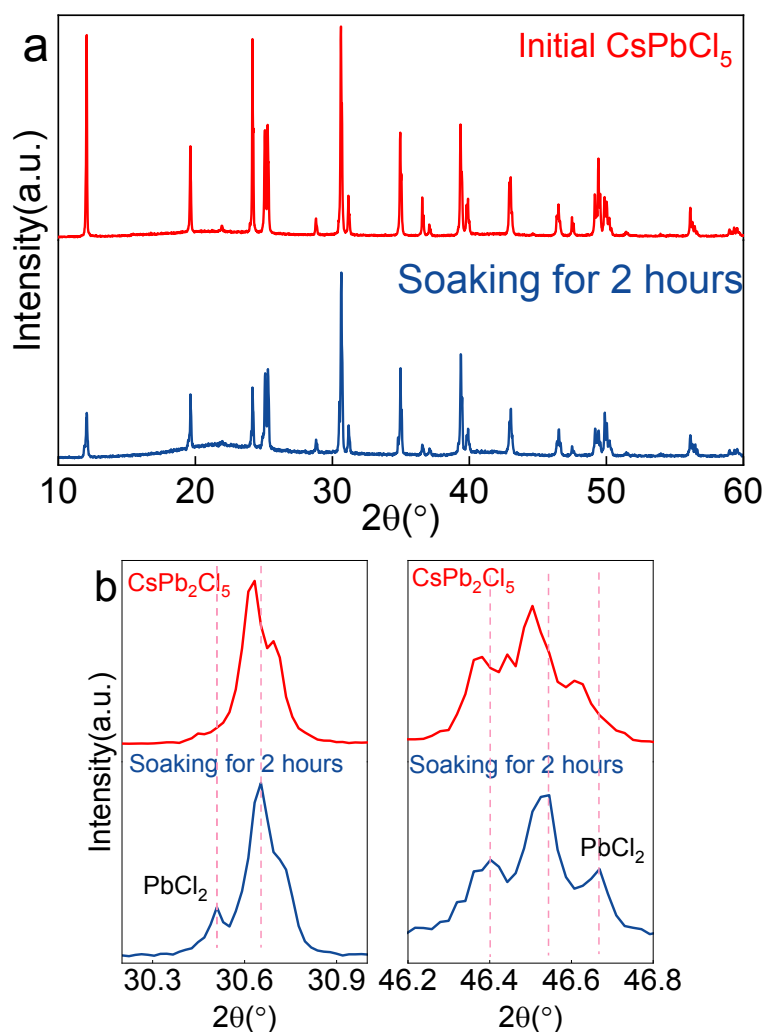

Figure S7. (a-b) The XRD and Magnified XRD of initial  $\text{CsPb}_2\text{Cl}_5$  and after soaking for 2 hours using a 306 nm illumination.
